# Supplementary material
Source: PubMed Central journal article supplement (PMC7202333)

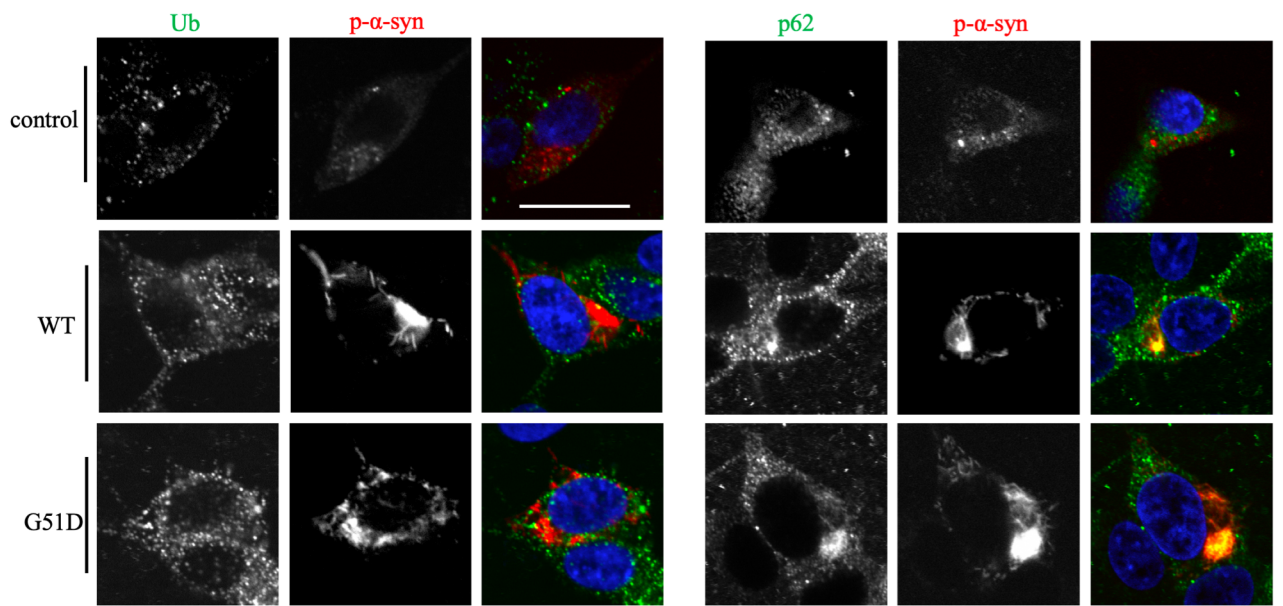

Supplement: NIHMS1582855-supplement-Supplementary_Fig_2.pdf [file NIHMS1582855-supplement-Supplementary_Fig_2.pdf]

WT

G51D

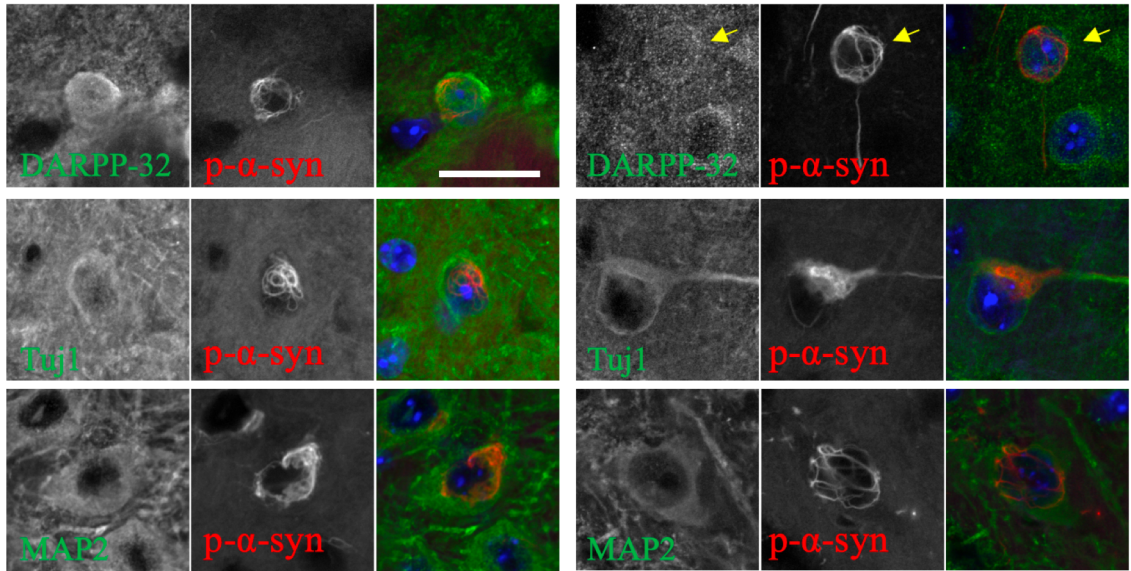

Supplement: NIHMS1582855-supplement-Supplementary_Fig_5.pdf [file NIHMS1582855-supplement-Supplementary_Fig_5.pdf]

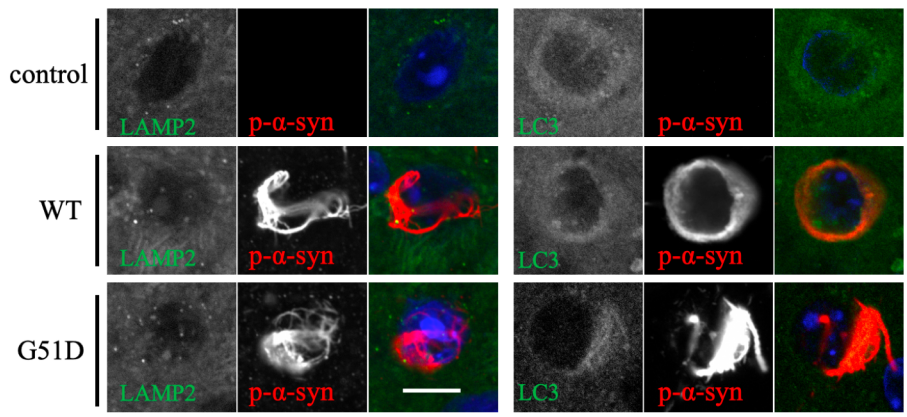

Supplement: NIHMS1582855-supplement-Supplementary_Fig_7.pdf [file NIHMS1582855-supplement-Supplementary_Fig_7.pdf]

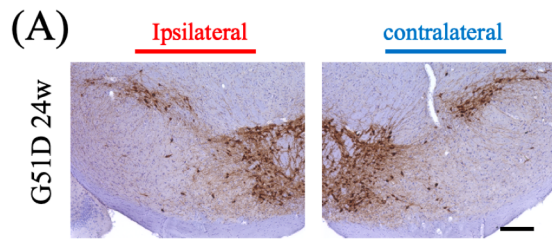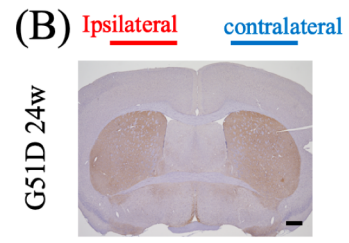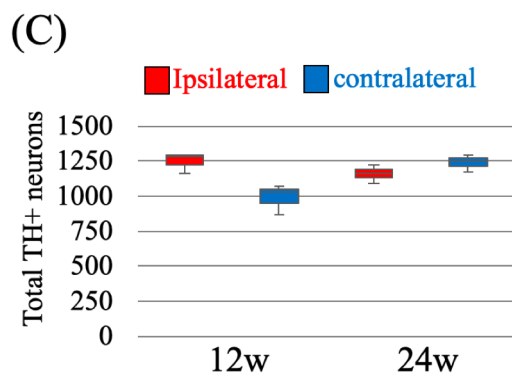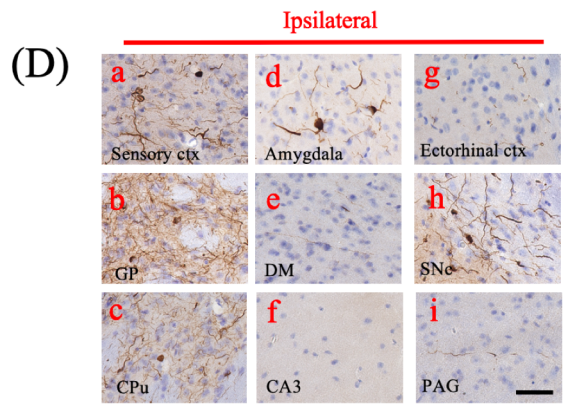

Supplement: NIHMS1582855-supplement-Supplementary_Fig_8.pdf [file NIHMS1582855-supplement-Supplementary_Fig_8.pdf]
